# Supplementary material
Source: HighWire-hosted journal article supplement (https://ebm.bmj.com/content/26/5/254)
Supplement: inline-supplementary-material-2 [file inline-supplementary-material-2.pdf]

## APPENDIX B

### Question set for study participants (n=8)

1. Why did you participate in this study?
2. Why do you think your fellow colleagues would not have participated in this study?
3. If you could change any aspect of your recruitment into this study, what would it be?
4. If you could change any aspect of how we collected your data in this study, what would it be?
5. What did you like and/or dislike about the online course that you completed?
6. What subject areas did you find relevant to your course work?
7. If you could change any aspect of the course, what would it be?
8. Do you have any additional insights, information or advice that would improve your experience of this study, or the online EBM Primer course?

### Question set for non-study participants (n=26)

1. Did you consider participating in our feasibility study for the Evidence-Based Medicine Primer Course? If not, why not?
2. If you considered participating in the study, what prevented you from doing so? (example: time, not a priority, no interest in content, hassle, confusing documents, etc.)
3. Would you be interested in accessing any online course we've developed in Evidence-Based Medicine? If yes, what topic areas are of particular interest or importance to you?
4. Do you have any additional insights, information, or advice that would help us improve our resource provision and skills training in evidence-based practice of medicine?
